# Supplementary material for: Improving Protection Agains Intruders Using Passive Sonar
Source: Springer Nature journal article supplement (doi:10.1186/s12936-015-0864-3), 2011-01-01
Supplement: MOESM1 [file 9761598]

## Additional File 1 – Tables

### Distributions of malaria exposure in endemic countries in Africa considering country levels of effective treatment

Melissa A. Penny\*, Nicolas Maire, Caitlin Bever, Peter Pemberton-Ross, Olivier J.T. Briët, David L. Smith, Peter W. Gething, Thomas A. Smith

\* Correspondence: [melissa.penny@unibas.ch](mailto:melissa.penny@unibas.ch)

This Additional file includes additional results that support and expand some of the results in the main text, but whose inclusion would detract from the main argument

#### Additional File 1: Table S1: Mapping of 14 day effective coverage onto 5 day probability of effective treatment (required input to OpenMalaria)

| Effective coverage $E_{14}$ (%) | OpenMalaria 5 day probability $E_5$ (%) |
|---------------------------------|-----------------------------------------|
| 0.1                             | 0.04                                    |
| 1                               | 0.37                                    |
| 5                               | 1.82                                    |
| 10                              | 3.56                                    |
| 15                              | 5.16                                    |
| 20                              | 7.25                                    |
| 25                              | 9.72                                    |
| 30                              | 12.27                                   |
| 35                              | 14.88                                   |
| 40                              | 17.82                                   |
| 45                              | 20.93                                   |
| 50                              | 24.12                                   |
| 55                              | 27.15                                   |
| 60                              | 30.30                                   |
| 65                              | 35.67                                   |
| 70                              | 41.65                                   |
| 75                              | 46.46                                   |
| 80                              | 53.19                                   |

**Additional File 1: Table S2. EIR distributions obtained with the simulation models (Method B) with country-specific effectiveness of case management( $E_{14}$ )**

| country                      | country code | Weighted mean EIR | $E_{14}$ (%)<br>[1] | EIR midpoint (range) |                     |                  |                  |                  |                  |                   |                  |                         |
|------------------------------|--------------|-------------------|---------------------|----------------------|---------------------|------------------|------------------|------------------|------------------|-------------------|------------------|-------------------------|
|                              |              |                   |                     | 0<br>(0-0.071)       | 0.1<br>(0.071-0.71) | 1<br>(0.71-1.41) | 2<br>(1.41-2.83) | 4<br>(2.83-5.66) | 8<br>(5.66-11.3) | 16<br>(11.3-45.3) | 64<br>(45.3-181) | 256<br>(181- $\infty$ ) |
| Angola                       | ago          | 49.8              | 49.5                | 0.003                | 0.165               | 0.094            | 0.082            | 0.117            | 0.115            | 0.164             | 0.110            | 0.150                   |
| Benin                        | ben          | 72.8              | 34.5                | 0.000                | 0.094               | 0.072            | 0.071            | 0.109            | 0.114            | 0.173             | 0.133            | 0.234                   |
| Botswana                     | bwa          | 5.3               | 72.0                | 0.529                | 0.144               | 0.057            | 0.051            | 0.069            | 0.059            | 0.061             | 0.022            | 0.008                   |
| Burkina Faso                 | bfa          | 118.1             | 35.9                | 0.000                | 0.031               | 0.035            | 0.040            | 0.071            | 0.086            | 0.161             | 0.174            | 0.404                   |
| Burundi                      | bdi          | 13.5              | 42.4                | 0.103                | 0.290               | 0.127            | 0.096            | 0.117            | 0.094            | 0.101             | 0.042            | 0.030                   |
| Cameroon                     | cmr          | 67.4              | 29.9                | 0.003                | 0.117               | 0.078            | 0.074            | 0.111            | 0.113            | 0.165             | 0.124            | 0.216                   |
| Central African Republic     | caf          | 61.5              | 18.9                | 0.000                | 0.185               | 0.088            | 0.075            | 0.105            | 0.100            | 0.140             | 0.107            | 0.199                   |
| Chad                         | tcd          | 27.8              | 20.7                | 0.030                | 0.344               | 0.110            | 0.083            | 0.103            | 0.087            | 0.103             | 0.060            | 0.082                   |
| Comoros                      | com          | 46.5              | 39.2                | 0.015                | 0.202               | 0.097            | 0.082            | 0.113            | 0.107            | 0.145             | 0.096            | 0.143                   |
| Congo                        | cog          | 49.0              | 44.1                | 0.000                | 0.130               | 0.089            | 0.084            | 0.126            | 0.128            | 0.183             | 0.116            | 0.144                   |
| Democratic Republic of Congo | cod          | 47.4              | 30.2                | 0.039                | 0.204               | 0.092            | 0.078            | 0.108            | 0.102            | 0.138             | 0.093            | 0.148                   |
| Cote d'Ivoire                | civ          | 78.8              | 29.2                | 0.000                | 0.083               | 0.066            | 0.066            | 0.104            | 0.111            | 0.173             | 0.140            | 0.256                   |
| Djibouti                     | dji          | 0.2               | 48.6                | 0.915                | 0.051               | 0.014            | 0.008            | 0.007            | 0.003            | 0.002             | 0.001            | 0.000                   |
| Equatorial Guinea            | gnq          | 76.8              | 24.0                | 0.018                | 0.092               | 0.068            | 0.066            | 0.102            | 0.106            | 0.163             | 0.133            | 0.251                   |
| Eritrea                      | eri          | 1.1               | 25.2                | 0.081                | 0.785               | 0.058            | 0.027            | 0.022            | 0.013            | 0.010             | 0.003            | 0.001                   |
| Ethiopia                     | eth          | 1.0               | 16.4                | 0.189                | 0.708               | 0.040            | 0.020            | 0.019            | 0.011            | 0.009             | 0.003            | 0.001                   |
| Gabon                        | gab          | 71.7              | 40.8                | 0.000                | 0.073               | 0.064            | 0.067            | 0.110            | 0.122            | 0.194             | 0.146            | 0.225                   |
| The Gambia                   | gmb          | 7.3               | 40.8                | 0.000                | 0.340               | 0.160            | 0.120            | 0.142            | 0.106            | 0.096             | 0.028            | 0.008                   |
| Ghana                        | gha          | 52.3              | 43.0                | 0.000                | 0.138               | 0.091            | 0.084            | 0.123            | 0.122            | 0.171             | 0.112            | 0.159                   |
| Guinea                       | gin          | 39.7              | 28.4                | 0.000                | 0.243               | 0.106            | 0.087            | 0.118            | 0.107            | 0.137             | 0.084            | 0.119                   |
| Guinea Bissau                | gnb          | 6.3               | 29.5                | 0.000                | 0.445               | 0.156            | 0.107            | 0.116            | 0.080            | 0.068             | 0.020            | 0.009                   |
| Kenya                        | ken          | 7.7               | 37.8                | 0.187                | 0.489               | 0.092            | 0.053            | 0.054            | 0.041            | 0.045             | 0.021            | 0.019                   |
| Liberia                      | lbr          | 60.2              | 47.4                | 0.000                | 0.044               | 0.056            | 0.066            | 0.120            | 0.144            | 0.238             | 0.160            | 0.173                   |
| Madagascar                   | mdg          | 42.0              | 22.4                | 0.046                | 0.316               | 0.090            | 0.069            | 0.089            | 0.079            | 0.103             | 0.074            | 0.134                   |
| Malawi                       | mwi          | 54.5              | 37.7                | 0.000                | 0.128               | 0.085            | 0.080            | 0.121            | 0.123            | 0.178             | 0.119            | 0.166                   |
| Mali                         | mli          | 76.0              | 29.2                | 0.014                | 0.098               | 0.068            | 0.066            | 0.102            | 0.107            | 0.165             | 0.133            | 0.247                   |
| Mauritania                   | mrt          | 5.4               | 24.5                | 0.286                | 0.496               | 0.064            | 0.037            | 0.038            | 0.027            | 0.026             | 0.012            | 0.014                   |
| Mozambique                   | moz          | 65.8              | 38.7                | 0.000                | 0.144               | 0.081            | 0.073            | 0.107            | 0.107            | 0.158             | 0.120            | 0.211                   |
| Namibia                      | nam          | 11.3              | 39.6                | 0.331                | 0.264               | 0.087            | 0.061            | 0.073            | 0.059            | 0.066             | 0.031            | 0.028                   |
| Niger                        | ner          | 35.3              | 33.1                | 0.019                | 0.215               | 0.108            | 0.092            | 0.125            | 0.114            | 0.143             | 0.082            | 0.102                   |
| Nigeria                      | nga          | 65.7              | 40.9                | 0.000                | 0.111               | 0.077            | 0.074            | 0.113            | 0.117            | 0.173             | 0.127            | 0.208                   |
| Rwanda                       | rwa          | 2.2               | 41.5                | 0.221                | 0.465               | 0.117            | 0.066            | 0.060            | 0.036            | 0.027             | 0.007            | 0.002                   |
| Sao Tome Principe            | stp          | 25.8              | 68.8                | 0.000                | 0.135               | 0.090            | 0.090            | 0.145            | 0.155            | 0.223             | 0.112            | 0.051                   |
| Senegal                      | sen          | 5.8               | 34.0                | 0.000                | 0.515               | 0.144            | 0.093            | 0.098            | 0.066            | 0.057             | 0.018            | 0.010                   |
| Sierra Leone                 | sle          | 61.0              | 39.3                | 0.000                | 0.102               | 0.076            | 0.075            | 0.118            | 0.125            | 0.188             | 0.130            | 0.188                   |
| Somalia                      | som          | 1.1               | 7.8                 | 0.021                | 0.849               | 0.049            | 0.027            | 0.024            | 0.015            | 0.011             | 0.003            | 0.001                   |
| North Sudan                  | sdn          | 7.0               | 20.7                | 0.063                | 0.711               | 0.063            | 0.036            | 0.037            | 0.027            | 0.028             | 0.015            | 0.020                   |
| South Sudan                  | ssd          | 17.0              | 9.2                 | 0.000                | 0.652               | 0.068            | 0.046            | 0.054            | 0.044            | 0.052             | 0.033            | 0.052                   |
| Tanzania                     | tza          | 25.1              | 46.9                | 0.019                | 0.290               | 0.121            | 0.093            | 0.117            | 0.102            | 0.125             | 0.066            | 0.068                   |
| Togo                         | tgo          | 58.9              | 19.8                | 0.000                | 0.170               | 0.091            | 0.080            | 0.112            | 0.106            | 0.146             | 0.106            | 0.188                   |
| Uganda                       | uga          | 89.7              | 67.1                | 0.036                | 0.035               | 0.033            | 0.038            | 0.074            | 0.099            | 0.206             | 0.195            | 0.284                   |
| Zambia                       | zmb          | 26.9              | 52.7                | 0.000                | 0.238               | 0.123            | 0.100            | 0.131            | 0.117            | 0.146             | 0.077            | 0.070                   |
| Zimbabwe                     | zwe          | 2.8               | 27.0                | 0.006                | 0.741               | 0.090            | 0.049            | 0.046            | 0.030            | 0.026             | 0.008            | 0.005                   |

**Additional File 1: Table S3. Prevalence distributions, summarized for each country:**  
 Estimated prevalence (mean, median and quartiles) for 43 sub-Saharan Africa estimated from MAP prevalence posteriors at 5km by 5 km grids, aggregated to country level and weighted by population.

| country                      | country code | mean prevalence | prevalence median | prevalence 25% quartile | prevalence 75% quartile |
|------------------------------|--------------|-----------------|-------------------|-------------------------|-------------------------|
| Angola                       | ago          | 0.284           | 0.160             | 0.001                   | 0.480                   |
| Benin                        | ben          | 0.467           | 0.440             | 0.160                   | 0.720                   |
| Botswana                     | bwa          | 0.018           | 0.000             | 0.000                   | 0.001                   |
| Burkina Faso                 | bfa          | 0.622           | 0.680             | 0.400                   | 0.840                   |
| Burundi                      | bdi          | 0.114           | 0.001             | 0.000                   | 0.120                   |
| Cameroon                     | cmr          | 0.457           | 0.440             | 0.160                   | 0.720                   |
| Central African Republic     | caf          | 0.462           | 0.440             | 0.160                   | 0.720                   |
| Chad                         | tcd          | 0.265           | 0.120             | 0.001                   | 0.440                   |
| Comoros                      | com          | 0.302           | 0.160             | 0.001                   | 0.520                   |
| Congo                        | cog          | 0.318           | 0.240             | 0.040                   | 0.520                   |
| Democratic Republic of Congo | cod          | 0.344           | 0.240             | 0.040                   | 0.600                   |
| Cote d'Ivoire                | civ          | 0.514           | 0.520             | 0.240                   | 0.760                   |
| Djibouti                     | dji          | 0.001           | 0.000             | 0.000                   | 0.000                   |
| Equatorial Guinea            | gnq          | 0.520           | 0.520             | 0.240                   | 0.760                   |
| Eritrea                      | eri          | 0.018           | 0.001             | 0.000                   | 0.001                   |
| Ethiopia                     | eth          | 0.023           | 0.000             | 0.000                   | 0.001                   |
| Gabon                        | gab          | 0.432           | 0.400             | 0.160                   | 0.680                   |
| The Gambia                   | gmb          | 0.092           | 0.001             | 0.001                   | 0.120                   |
| Ghana                        | gha          | 0.337           | 0.240             | 0.040                   | 0.560                   |
| Guinea                       | gin          | 0.322           | 0.200             | 0.040                   | 0.520                   |
| Guinea Bissau                | gnb          | 0.105           | 0.040             | 0.001                   | 0.120                   |
| Kenya                        | ken          | 0.068           | 0.001             | 0.000                   | 0.001                   |
| Liberia                      | lbr          | 0.395           | 0.360             | 0.160                   | 0.560                   |
| Madagascar                   | mdg          | 0.308           | 0.160             | 0.001                   | 0.560                   |
| Malawi                       | mwi          | 0.355           | 0.280             | 0.080                   | 0.600                   |
| Mali                         | mli          | 0.483           | 0.480             | 0.160                   | 0.760                   |
| Mauritania                   | mrt          | 0.058           | 0.000             | 0.000                   | 0.001                   |
| Mozambique                   | moz          | 0.391           | 0.320             | 0.040                   | 0.680                   |
| Namibia                      | nam          | 0.095           | 0.001             | 0.000                   | 0.080                   |
| Niger                        | ner          | 0.285           | 0.160             | 0.001                   | 0.480                   |
| Nigeria                      | nga          | 0.429           | 0.400             | 0.120                   | 0.680                   |
| Rwanda                       | rwa          | 0.023           | 0.000             | 0.000                   | 0.001                   |
| Sao Tome Principe            | stp          | 0.122           | 0.040             | 0.001                   | 0.160                   |
| Senegal                      | sen          | 0.076           | 0.001             | 0.000                   | 0.080                   |
| Sierra Leone                 | sle          | 0.401           | 0.360             | 0.120                   | 0.640                   |
| Somalia                      | som          | 0.039           | 0.001             | 0.000                   | 0.001                   |
| North Sudan                  | sdn          | 0.072           | 0.001             | 0.000                   | 0.001                   |
| South Sudan                  | ssd          | 0.168           | 0.001             | 0.000                   | 0.240                   |
| Tanzania                     | tza          | 0.172           | 0.040             | 0.001                   | 0.240                   |
| Togo                         | tgo          | 0.440           | 0.400             | 0.120                   | 0.680                   |
| Uganda                       | uga          | 0.399           | 0.360             | 0.080                   | 0.640                   |
| Zambia                       | zmb          | 0.165           | 0.040             | 0.001                   | 0.240                   |
| Zimbabwe                     | zwe          | 0.044           | 0.001             | 0.000                   | 0.001                   |

**Additional File 1: Table S4: EIR distributions obtained with the empirical model  
(Method A)**

| country                      | country code | weighted mean EIR | weighted median EIR | EIR 25% quartile | EIR 75% quartile. |
|------------------------------|--------------|-------------------|---------------------|------------------|-------------------|
| Angola                       | ago          | 18.09             | 0.77                | 0.20             | 7.55              |
| Benin                        | ben          | 35.55             | 5.16                | 0.64             | 34.50             |
| Botswana                     | bwa          | 0.39              | 0.00                | 0.00             | 0.17              |
| Burkina Faso                 | bfa          | 61.15             | 19.52               | 2.92             | 89.16             |
| Burundi                      | bdi          | 3.57              | 0.25                | 0.07             | 0.94              |
| Cameroon                     | cmr          | 34.07             | 4.27                | 0.64             | 34.50             |
| Central African Republic     | caf          | 35.73             | 4.27                | 0.64             | 34.50             |
| Chad                         | tcd          | 14.67             | 0.77                | 0.17             | 5.16              |
| Comoros                      | com          | 19.71             | 0.94                | 0.20             | 9.13              |
| Congo                        | cog          | 18.07             | 1.13                | 0.25             | 9.13              |
| Democratic Republic of Congo | cod          | 23.32             | 1.37                | 0.25             | 13.35             |
| Cote d'Ivoire                | civ          | 40.56             | 7.55                | 1.13             | 41.71             |
| Djibouti                     | dji          | 0.03              | 0.00                | 0.00             | 0.00              |
| Equatorial Guinea            | gnq          | 41.78             | 7.55                | 1.13             | 50.44             |
| Eritrea                      | eri          | 0.49              | 0.14                | 0.05             | 0.36              |
| Ethiopia                     | eth          | 0.57              | 0.12                | 0.03             | 0.36              |
| Gabon                        | gab          | 29.59             | 3.53                | 0.53             | 23.60             |
| The Gambia                   | gmb          | 1.52              | 0.30                | 0.10             | 0.77              |
| Ghana                        | gha          | 21.40             | 1.37                | 0.25             | 11.04             |
| Guinea                       | gin          | 19.06             | 1.13                | 0.25             | 9.13              |
| Guinea Bissau                | gnb          | 2.18              | 0.30                | 0.12             | 0.94              |
| Kenya                        | ken          | 2.80              | 0.14                | 0.03             | 0.53              |
| Liberia                      | lbr          | 19.65             | 2.42                | 0.53             | 13.35             |
| Madagascar                   | mdg          | 22.87             | 0.94                | 0.17             | 11.04             |
| Malawi                       | mwi          | 22.02             | 1.65                | 0.30             | 13.35             |
| Mali                         | mli          | 38.53             | 6.25                | 0.77             | 41.71             |
| Mauritania                   | mrt          | 2.58              | 0.10                | 0.00             | 0.44              |
| Mozambique                   | moz          | 30.07             | 2.00                | 0.30             | 23.60             |
| Namibia                      | nam          | 3.66              | 0.12                | 0.00             | 0.64              |
| Niger                        | ner          | 15.30             | 0.94                | 0.20             | 6.25              |
| Nigeria                      | nga          | 30.51             | 3.53                | 0.53             | 28.53             |
| Rwanda                       | rwa          | 0.48              | 0.12                | 0.02             | 0.36              |
| Sao Tome Principe            | stp          | 2.22              | 0.36                | 0.12             | 1.13              |
| Senegal                      | sen          | 1.86              | 0.25                | 0.10             | 0.64              |
| Sierra Leone                 | sle          | 25.55             | 2.42                | 0.44             | 19.52             |
| Somalia                      | som          | 0.77              | 0.17                | 0.07             | 0.53              |
| North Sudan                  | sdn          | 3.65              | 0.20                | 0.07             | 0.53              |
| South Sudan                  | ssd          | 10.24             | 0.36                | 0.12             | 1.65              |
| Tanzania                     | tza          | 8.16              | 0.36                | 0.12             | 1.65              |
| Togo                         | tgo          | 32.62             | 3.53                | 0.53             | 28.53             |
| Uganda                       | uga          | 25.97             | 2.42                | 0.36             | 19.52             |
| Zambia                       | zmb          | 7.18              | 0.36                | 0.12             | 1.65              |
| Zimbabwe                     | zwe          | 1.12              | 0.20                | 0.08             | 0.53              |

**Additional File 1: Table S5: Estimated EIR (mean, median and quartiles) for 43 sub-Saharan Africa estimated via method B assuming effective coverage ( $E_{14}$ ) of 15% for all countries.**

| country                      | country code | weighted mean EIR | weighted median EIR | EIR 25% quartile | EIR 75% quartile. |
|------------------------------|--------------|-------------------|---------------------|------------------|-------------------|
| Angola                       | ago          | 32.04             | 1.37                | 0.20             | 11.04             |
| Benin                        | ben          | 61.90             | 7.55                | 1.37             | 89.16             |
| Botswana                     | bwa          | 0.68              | 0.00                | 0.00             | 0.05              |
| Burkina Faso                 | bfa          | 102.90            | 41.71               | 4.27             | 336.87            |
| Burundi                      | bdi          | 6.83              | 0.25                | 0.04             | 1.37              |
| Cameroon                     | cmr          | 59.73             | 7.55                | 1.13             | 73.74             |
| Central African Republic     | caf          | 62.15             | 7.55                | 1.13             | 89.16             |
| Chad                         | tcd          | 26.54             | 1.37                | 0.20             | 9.13              |
| Comoros                      | com          | 34.95             | 1.65                | 0.20             | 16.14             |
| Congo                        | cog          | 32.43             | 2.42                | 0.44             | 16.14             |
| Democratic Republic of Congo | cod          | 41.02             | 2.42                | 0.36             | 23.60             |
| Cote d'Ivoire                | civ          | 70.77             | 11.04               | 2.00             | 130.35            |
| Djibouti                     | dji          | 0.04              | 0.00                | 0.00             | 0.00              |
| Equatorial Guinea            | gnq          | 73.27             | 13.35               | 2.00             | 130.35            |
| Eritrea                      | eri          | 0.74              | 0.04                | 0.01             | 0.14              |
| Ethiopia                     | eth          | 0.92              | 0.03                | 0.01             | 0.14              |
| Gabon                        | gab          | 52.92             | 6.25                | 1.13             | 50.44             |
| The Gambia                   | gmb          | 2.94              | 0.36                | 0.08             | 1.37              |
| Ghana                        | gha          | 37.77             | 2.42                | 0.44             | 19.52             |
| Guinea                       | gin          | 34.42             | 2.42                | 0.36             | 16.14             |
| Guinea Bissau                | gnb          | 4.11              | 0.36                | 0.10             | 1.65              |
| Kenya                        | ken          | 4.92              | 0.04                | 0.01             | 0.30              |
| Liberia                      | lbr          | 35.74             | 4.27                | 1.13             | 23.60             |
| Madagascar                   | mdg          | 39.63             | 1.65                | 0.14             | 19.52             |
| Malawi                       | mwi          | 39.43             | 2.92                | 0.53             | 23.60             |
| Mali                         | mli          | 66.88             | 9.13                | 1.37             | 107.80            |
| Mauritania                   | mrt          | 4.65              | 0.04                | 0.00             | 0.30              |
| Mozambique                   | moz          | 51.99             | 3.53                | 0.53             | 50.44             |
| Namibia                      | nam          | 7.00              | 0.05                | 0.00             | 0.77              |
| Niger                        | ner          | 27.51             | 1.65                | 0.30             | 11.04             |
| Nigeria                      | nga          | 53.76             | 6.25                | 0.94             | 50.44             |
| Rwanda                       | rwa          | 0.73              | 0.04                | 0.00             | 0.17              |
| Sao Tome Principe            | stp          | 4.88              | 0.44                | 0.12             | 2.00              |
| Senegal                      | sen          | 3.40              | 0.20                | 0.04             | 0.94              |
| Sierra Leone                 | sle          | 45.85             | 4.27                | 0.77             | 34.50             |
| Somalia                      | som          | 1.36              | 0.08                | 0.02             | 0.30              |
| North Sudan                  | sdn          | 6.58              | 0.07                | 0.02             | 0.36              |
| South Sudan                  | ssd          | 18.28             | 0.25                | 0.04             | 2.42              |
| Tanzania                     | tza          | 14.82             | 0.44                | 0.07             | 2.92              |
| Togo                         | tgo          | 56.82             | 6.25                | 1.13             | 60.98             |
| Uganda                       | uga          | 46.31             | 4.27                | 0.77             | 34.50             |
| Zambia                       | zmb          | 13.29             | 0.44                | 0.07             | 2.92              |
| Zimbabwe                     | zwe          | 2.01              | 0.07                | 0.02             | 0.30              |

## References

1. Galactionova K, Tediosi F, Savigny Dd, Smith TA, Tanner M: **Effective coverage and systems effectiveness for malaria case management in Sub-Saharan African countries.** *PLoS ONE* 2015, **10**.
